# Supplementary material for: Nickel-catalyzed direct synthesis of hyperbranched liquid oligoethylene
Source: Royal Society of Chemistry journal article supplement (doi:10.1039/d4py00709c), 2024-01-01
Supplement: d4py00709c1.pdf [file d4py00709c1.pdf]

# Support Information

## Nickel-Catalyzed Direct Synthesis of Hyperbranched Liquid Oligoethylene

Mengyao Zhang<sup>a</sup>, Shengyu Dai<sup>\*a,b</sup>

<sup>a</sup>*Institutes of Physical Science and Information Technology, Anhui University, Hefei, Anhui, 230601, China.*

<sup>b</sup>*Anhui Laboratory of Molecule-Based Materials, Key Laboratory of Functional Molecular Solids, Ministry of Education, School of Chemistry and Materials Science, Anhui Normal University, Wuhu 241002, China.*

\*To whom correspondence should be addressed. daiyu@ustc.edu.cn (Shengyu Dai, +86/13955189794).

### 1. Experimental section

#### 1.1 General Considerations

All chemicals were commercially sourced, except those whose synthesis is described. All experiments were carried out under a dry nitrogen atmosphere in a glove-box. Deuterated solvents used for NMR were dried and distilled prior to use. <sup>1</sup>H and <sup>13</sup>C NMR spectra were recorded by a JNM-ECZ600R or JNM-ECZ400R spectrometer at ambient temperature unless otherwise stated. The chemical shifts of the <sup>1</sup>H and <sup>13</sup>C NMR spectra were referenced to the residual solvent; Coupling constants are in Hz. Mass spectra were obtained by the Analytical Center of Dalian University of Technology using matrix-assisted laser desorption ionization time-of-flight mass spectrometry (Bruker autoflex max). Elemental analysis and ESI-MS were performed by the Analytical Center of Anhui University. Molecular weight of the polymers was determined by <sup>1</sup>H and <sup>13</sup>C NMR spectra. Crystal data were collected on a XtaLAB Synergy diffractometer with the new generation of high-resolution X-ray detector HyPix6000HE, using Cu K $\alpha$  radiation ( $\lambda= 1.54184$ ) at 296.93 (10)K. GC Test (Yuke-GC-7860): Set the initial temperature to 50°C, ramp to 150°C at 10°C/min, then to 300°C at 3°C/min, and hold for 60 minutes using a HP-POMA column.

## 2.1 $^1\text{H}$ and $^{13}\text{C}$ NMR of the Synthetic Compounds.

ZMY-1  
single\_pulse

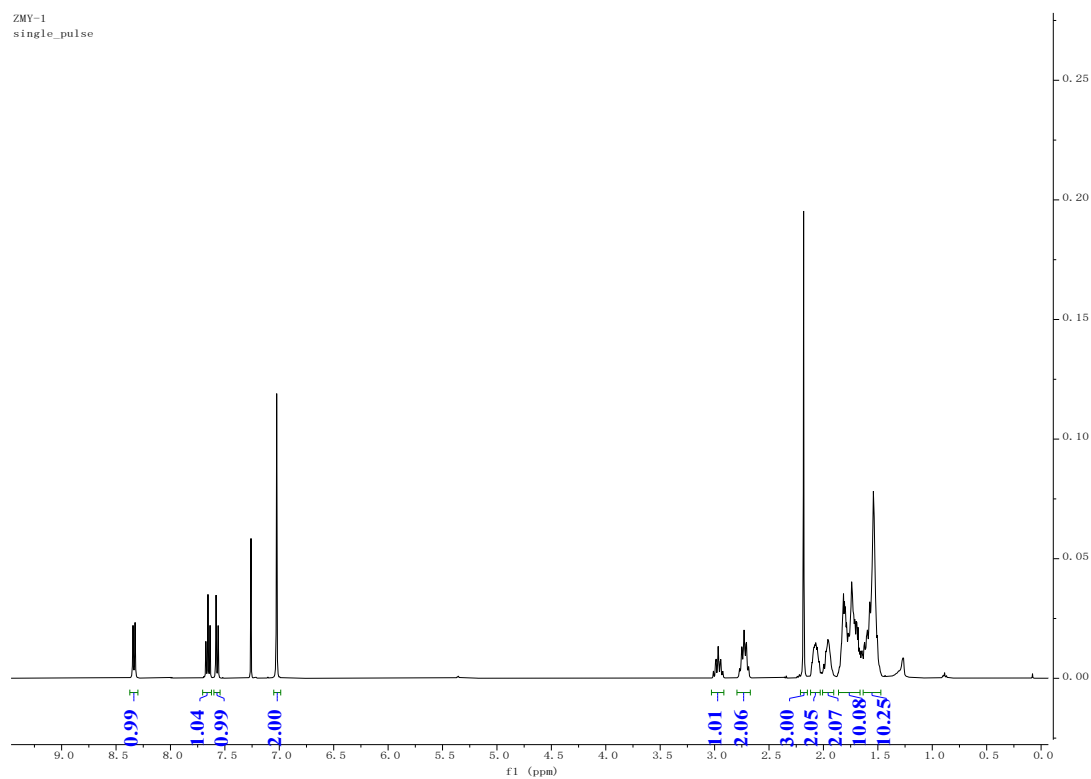

Figure S1.  $^1\text{H}$  NMR spectrum of L1 in  $\text{CDCl}_3$  (400 MHz, 20 °C).

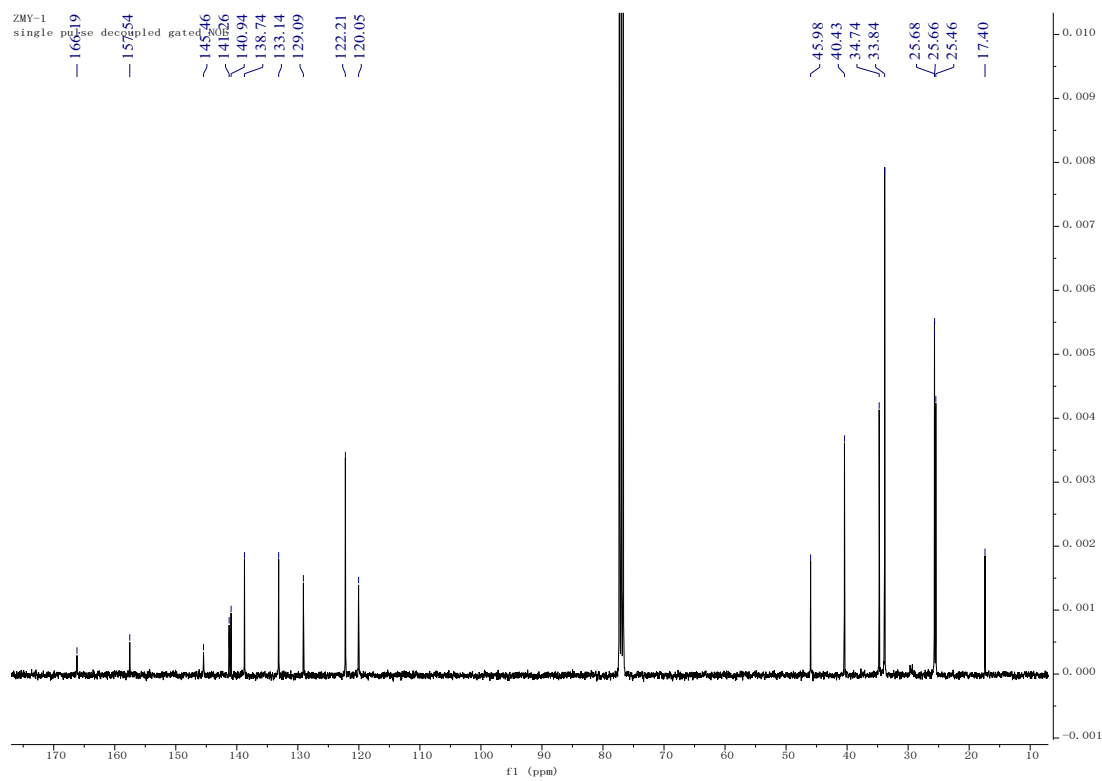

Figure S2.  $^{13}\text{C}$  NMR spectrum of L1 in  $\text{CDCl}_3$  (400 MHz, 20 °C).

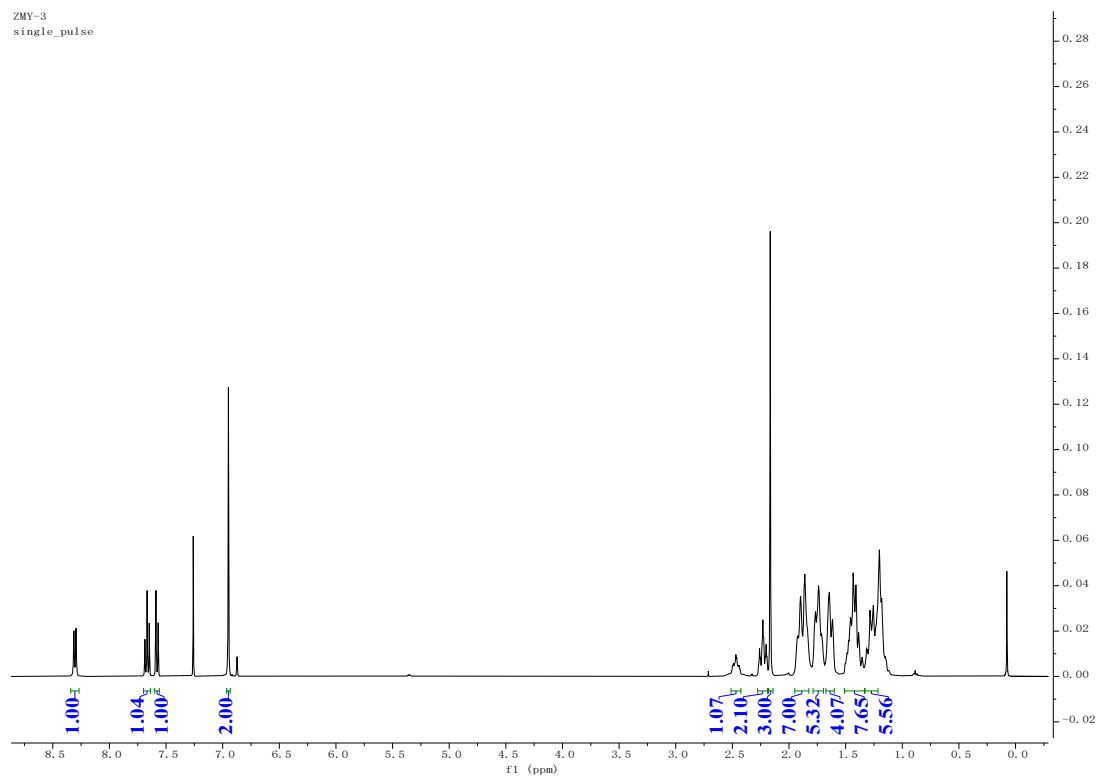

**Figure S3.**  $^1\text{H}$  NMR spectrum of **L2** in  $\text{CDCl}_3$  (400 MHz, 20 °C).

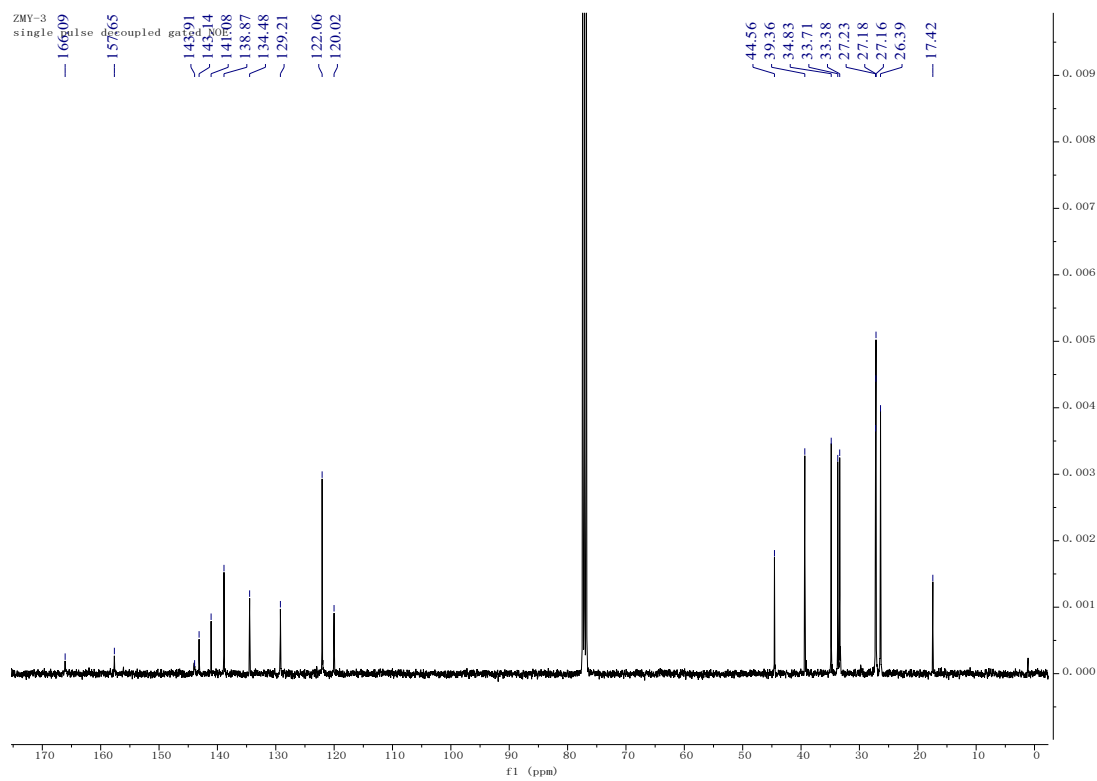

**Figure S4.**  $^{13}\text{C}$  NMR spectrum of **L2** in  $\text{CDCl}_3$  (400 MHz, 20 °C).

Feb28-2024.27.fid  
ZMY-1

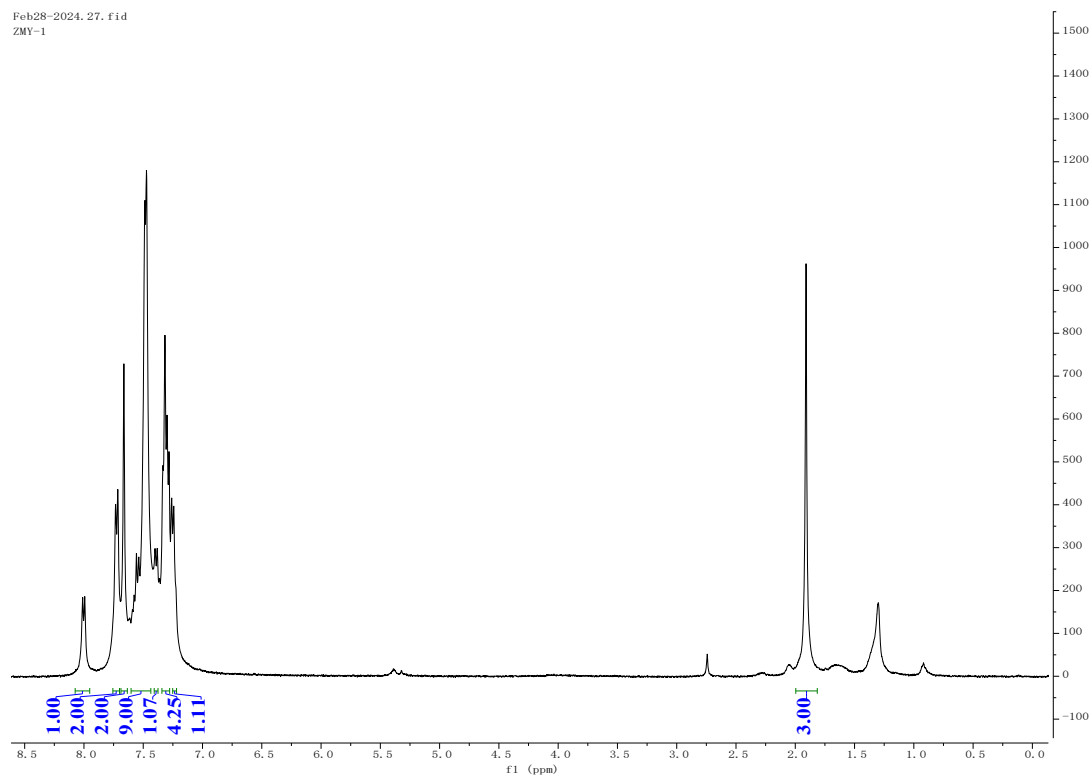

**Figure S5.** <sup>1</sup>H NMR spectrum of L3 in CDCl<sub>3</sub> (400 MHz, 20 °C).

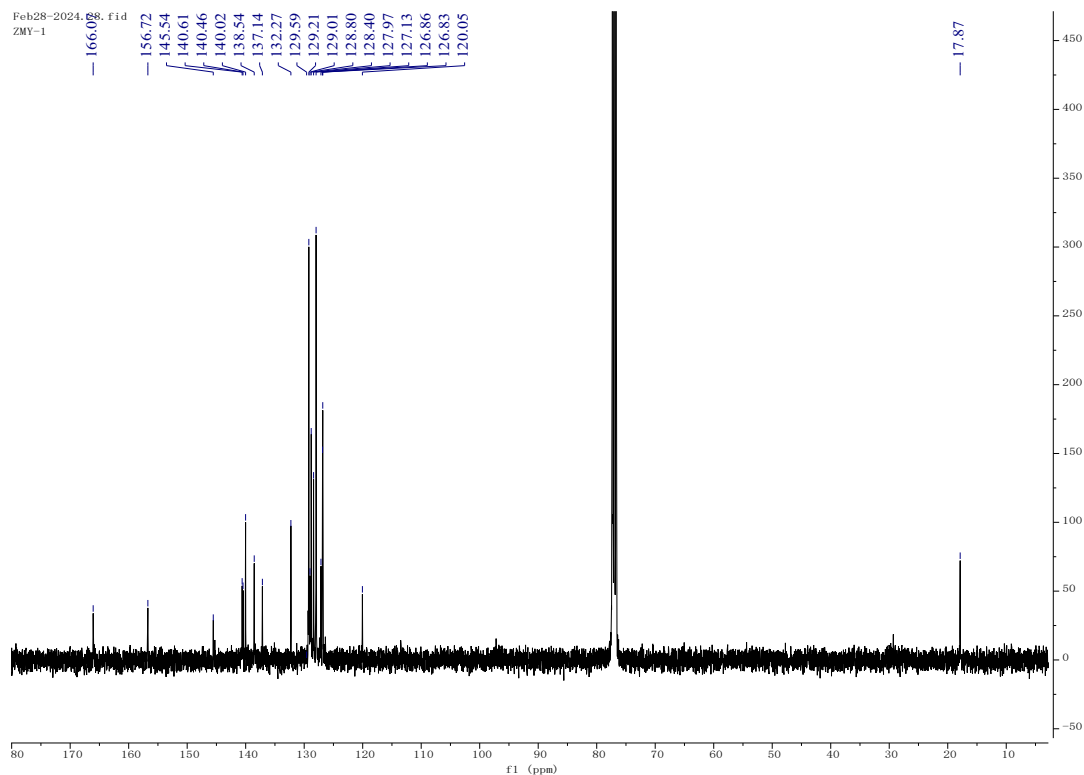

**Figure S6.** <sup>13</sup>C NMR spectrum of L3 in CDCl<sub>3</sub> (400 MHz, 20 °C).

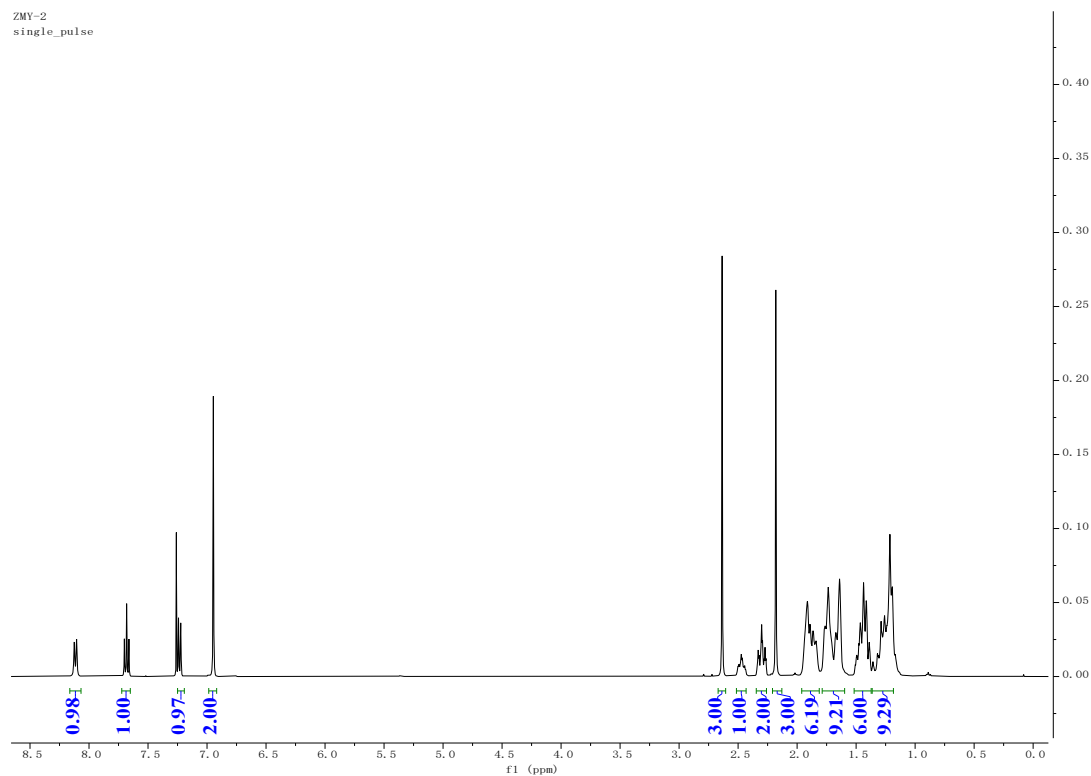

**Figure S7.**  $^1\text{H}$  NMR spectrum of **L4** in  $\text{CDCl}_3$  (400 MHz, 20 °C).

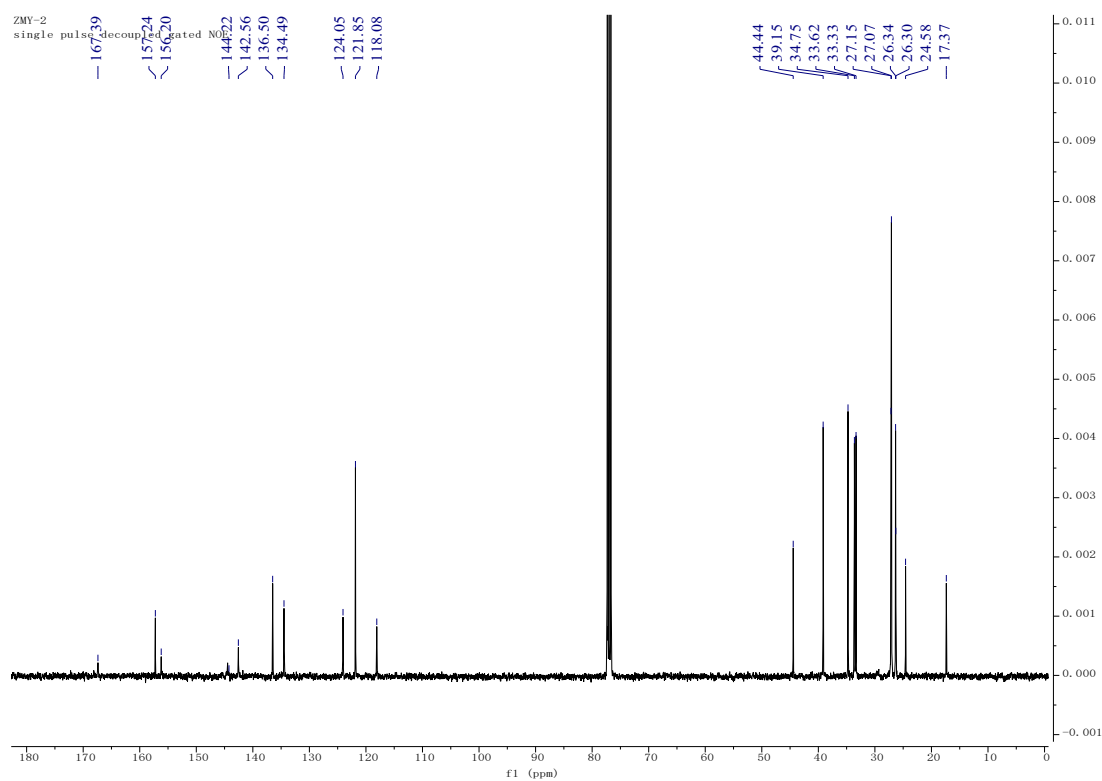

**Figure S8.**  $^{13}\text{C}$  NMR spectrum of **L4** in  $\text{CDCl}_3$  (400 MHz, 20 °C).

## 2.2 MS of L1-L4 and Ni1-Ni4.

ZMY-2 #4 RT: 0.05 AV: 1 SB: 1 0.02 NL: 1.96E6  
T: FTMS + c ESI Full ms [100.00-1000.00]

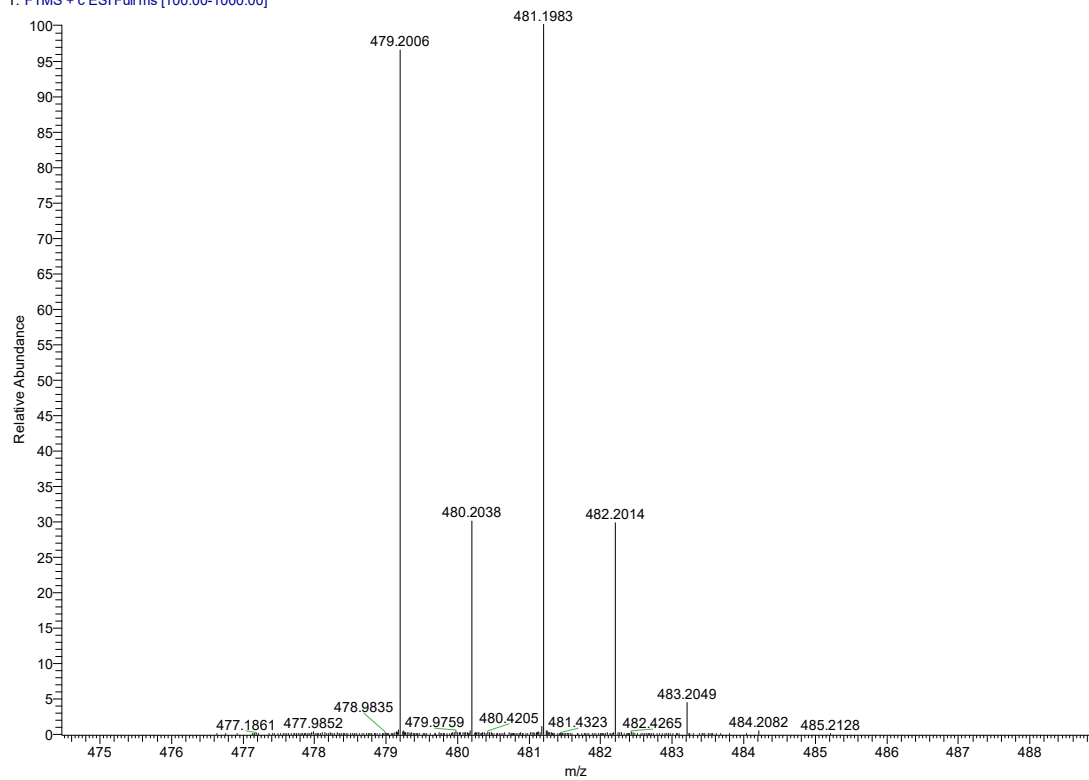

**Figure S9.** ESI-MS of L1.

ZMY-5 #59 RT: 0.47 AV: 1 SB: 1 0.03 NL: 6.18E6  
T: FTMS + c ESI Full ms [100.00-1000.00]

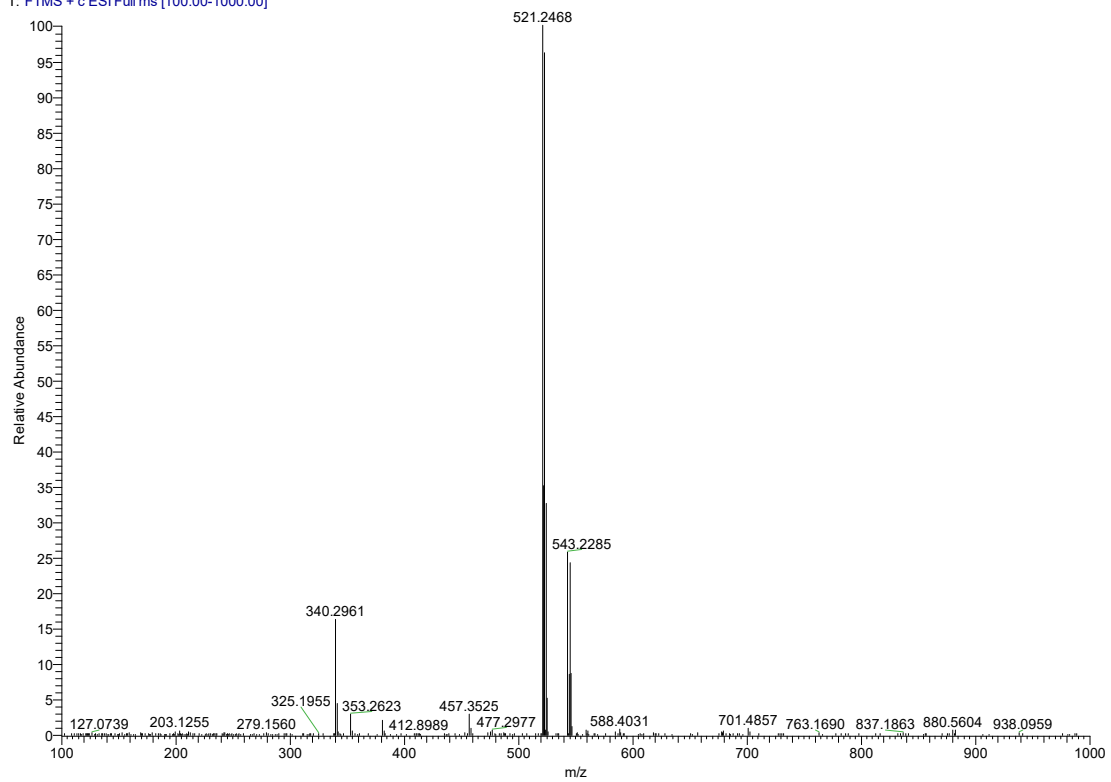

**Figure S10.** ESI-MS of L2.

ZMY-6 #9 RT: 0.07 AV: 1 SB: 1 0.02 NL: 2.88E7  
T: FTMS + c ESI Full ms [100.00-1000.00]

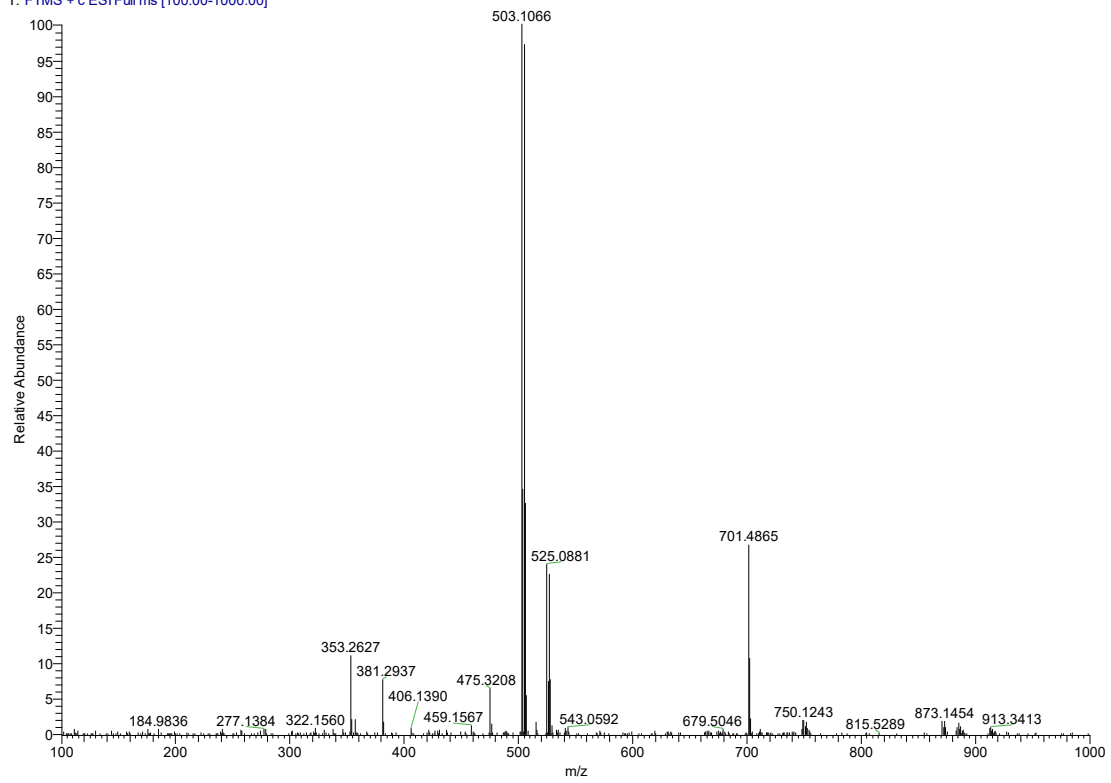

**Figure S11. ESI-MS of L3.**

ZMY-3 #72 RT: 0.58 AV: 1 SB: 1 0.04 NL: 5.58E6  
T: FTMS + c ESI Full ms [100.00-1000.00]

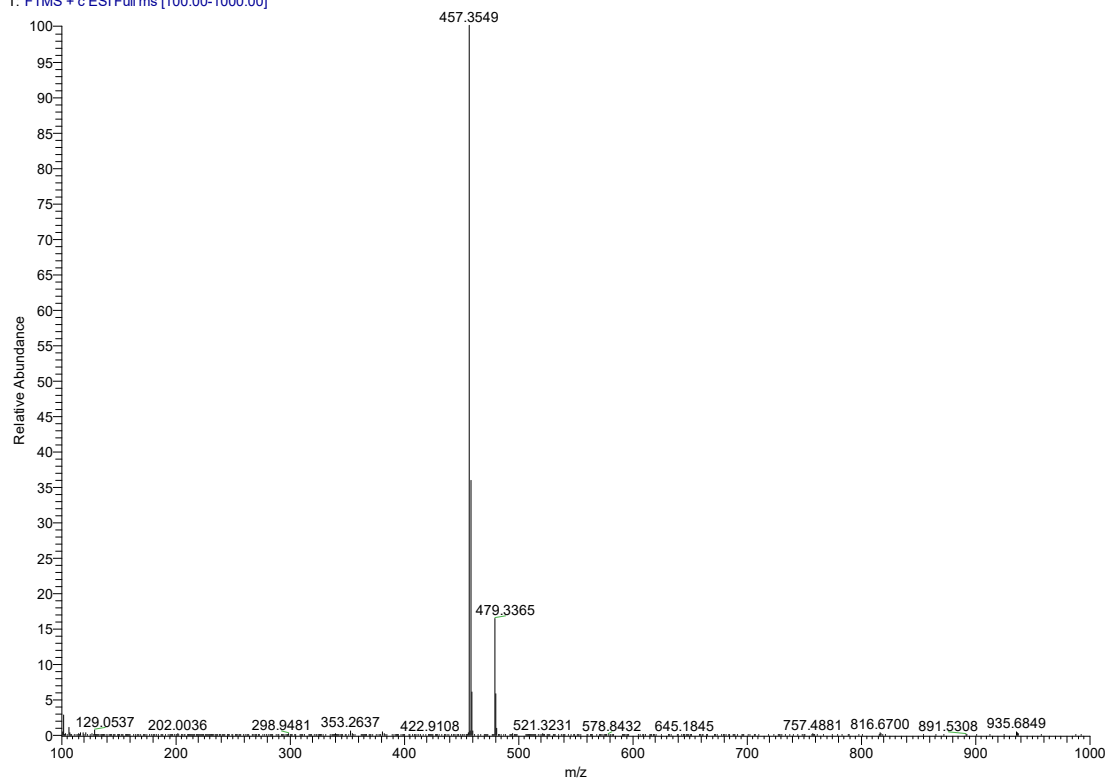

**Figure S12. ESI-MS of L4.**

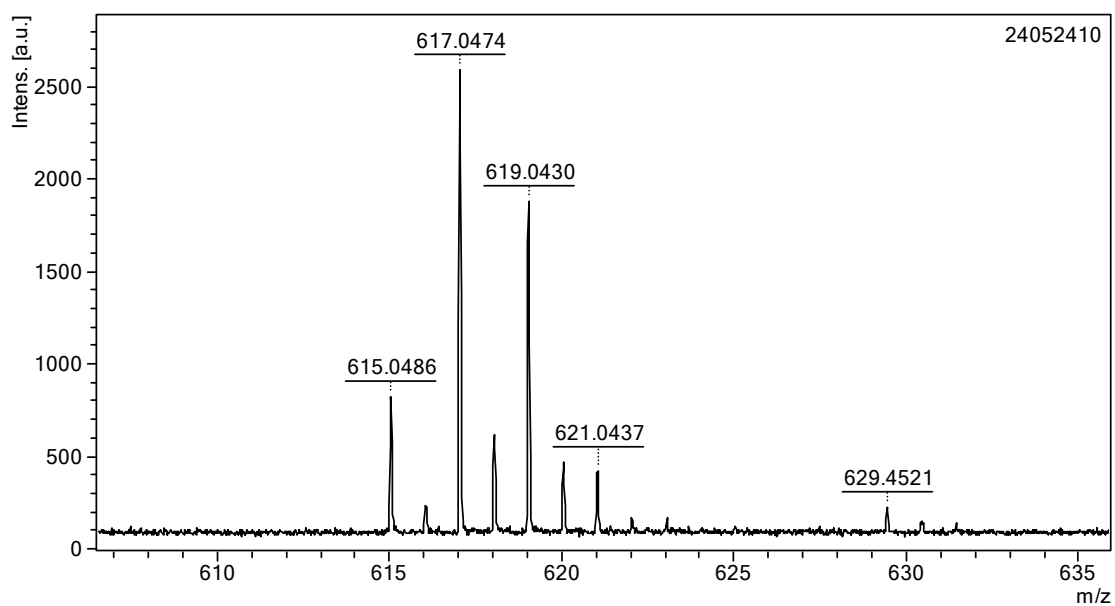

**Figure S13.** MALDI-TOF-MS of Ni1.

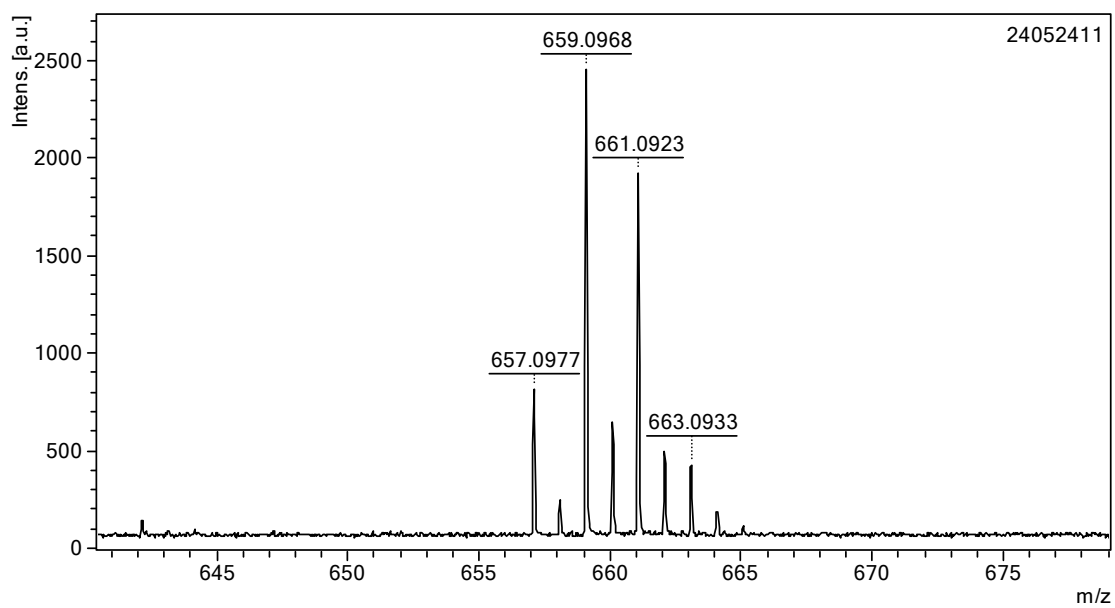

**Figure S14.** MALDI-TOF-MS of Ni2.



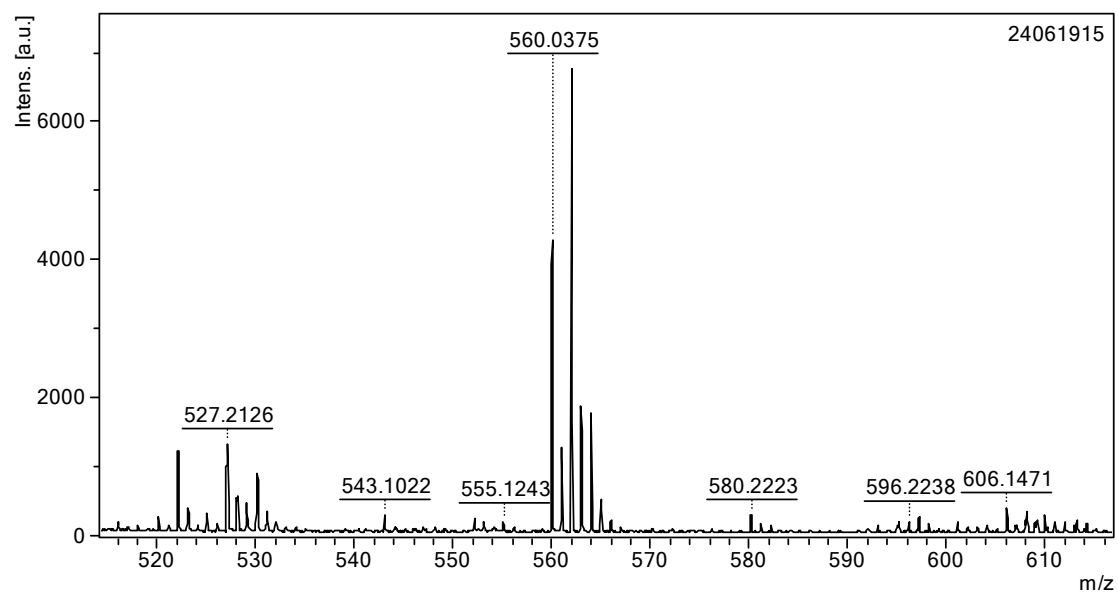

**Figure S15.** MALDI-TOF-MS of Ni<sub>3</sub>.

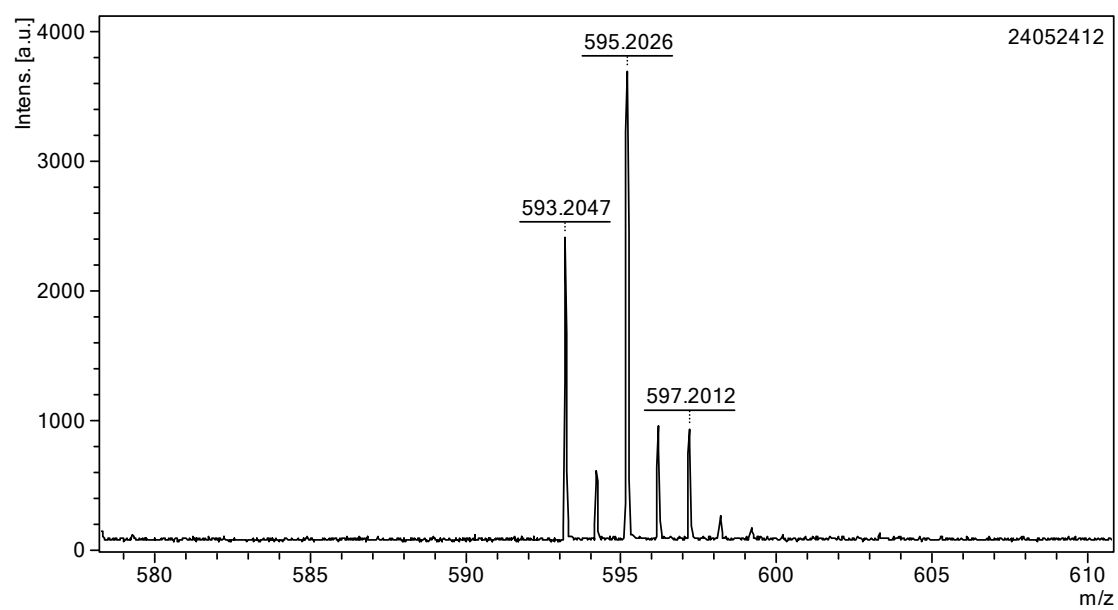

**Figure S16.** MALDI-TOF-MS of Ni<sub>4</sub>.

### 2.3 <sup>1</sup>H and <sup>13</sup>C NMR and GC of Representative HBOEOs.

Mar04-2024.55.fid  
ZMY-1

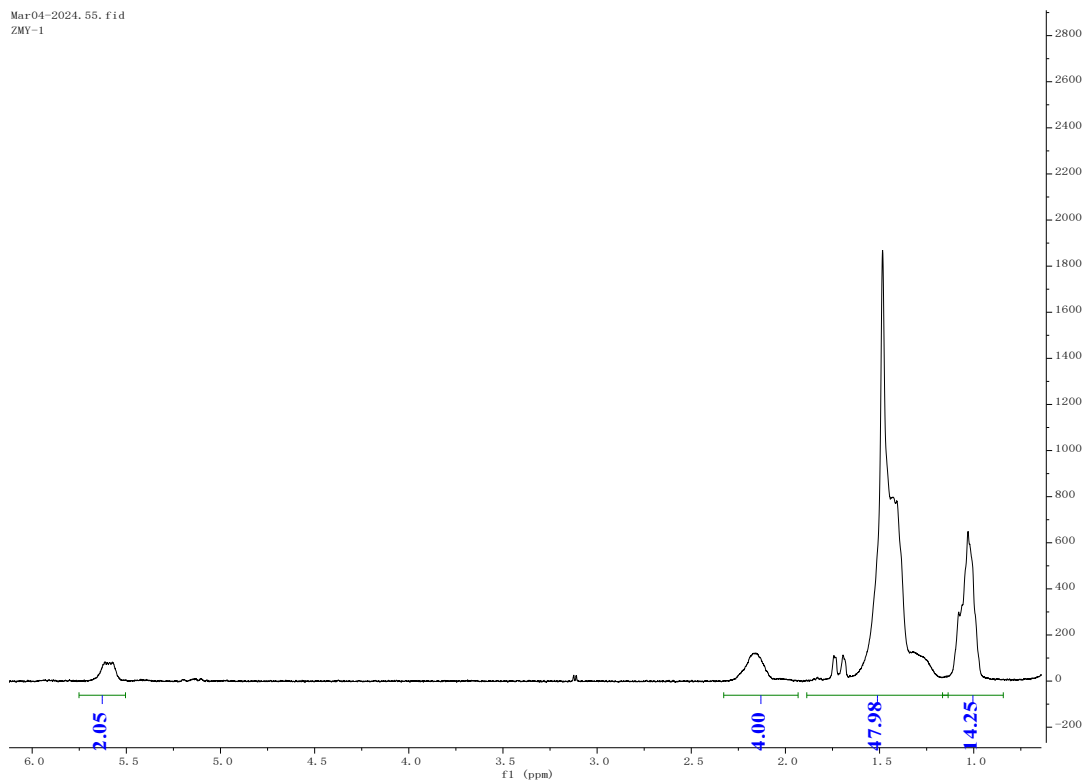

**Figure S17.** <sup>1</sup>H NMR spectrum of the HBOEO from table 1, entry 1 (CDCl<sub>3</sub>, 20 °C).

Mar06-2024.42.fid  
ZMY-2

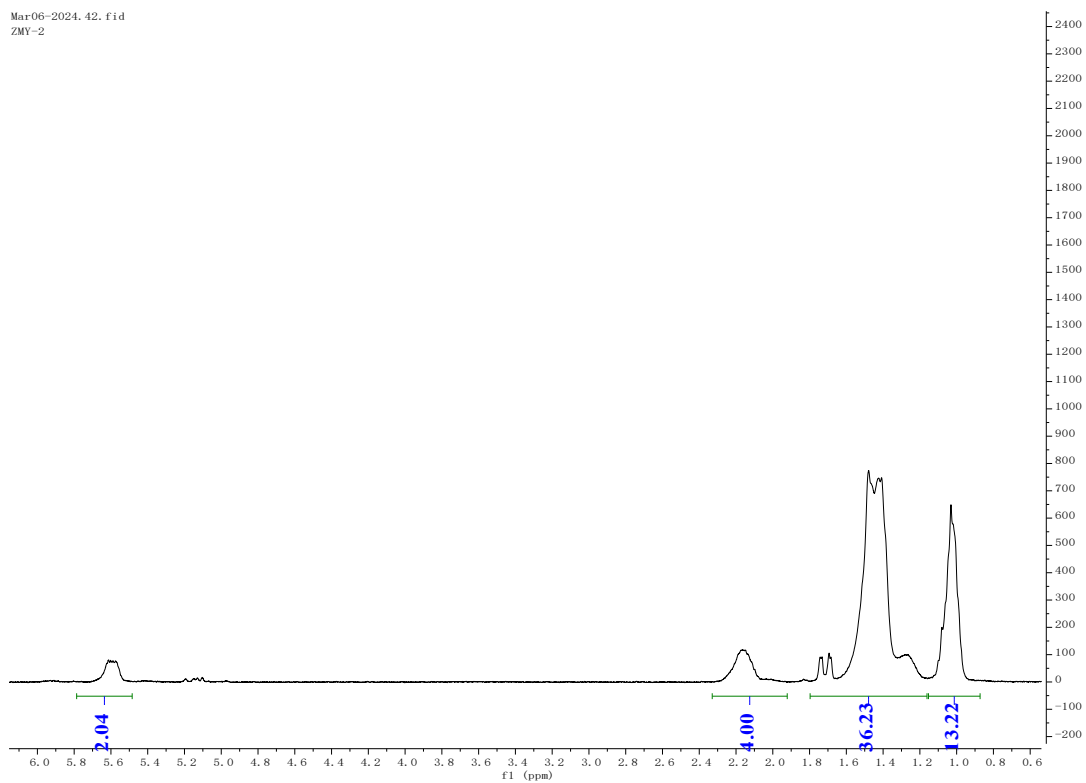

**Figure S18.** <sup>1</sup>H NMR spectrum of the HBOEO from table 1, entry 2 (CDCl<sub>3</sub>, 20 °C).

Mar06-2024\_43.fid  
ZMY-3

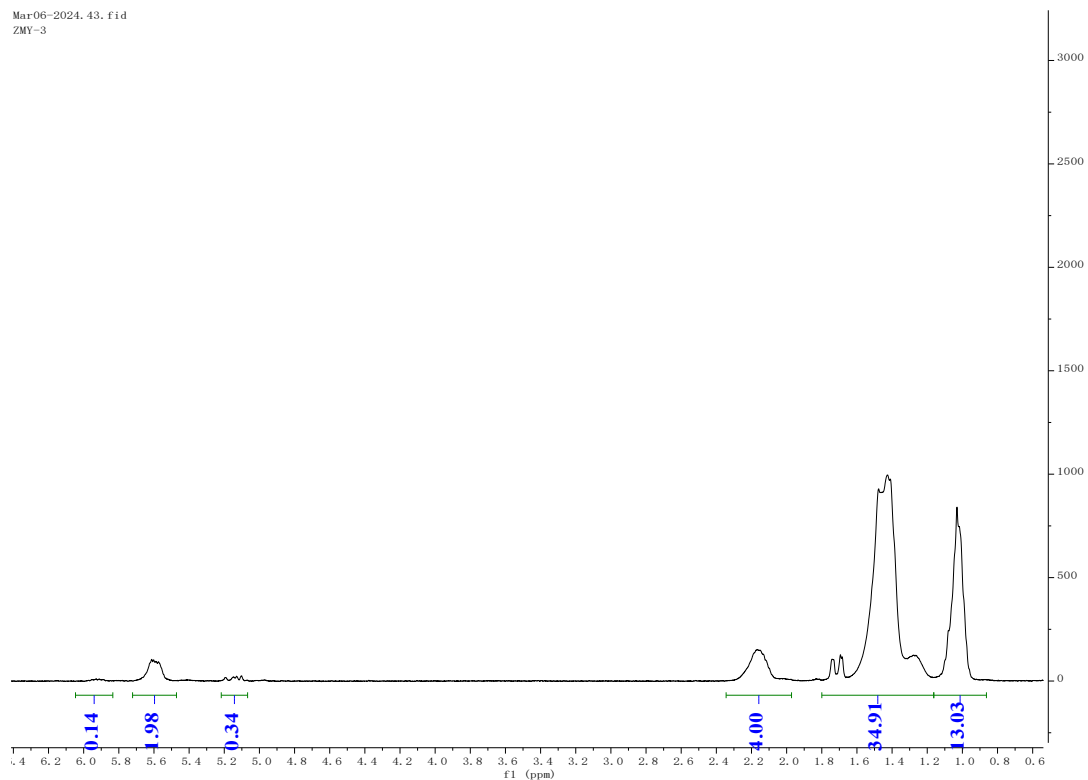

**Figure S19.** <sup>1</sup>H NMR spectrum of the HBOEO from table 1, entry 3 (CDCl<sub>3</sub>, 20 °C).

Mar06-2024\_44.fid  
ZMY-4

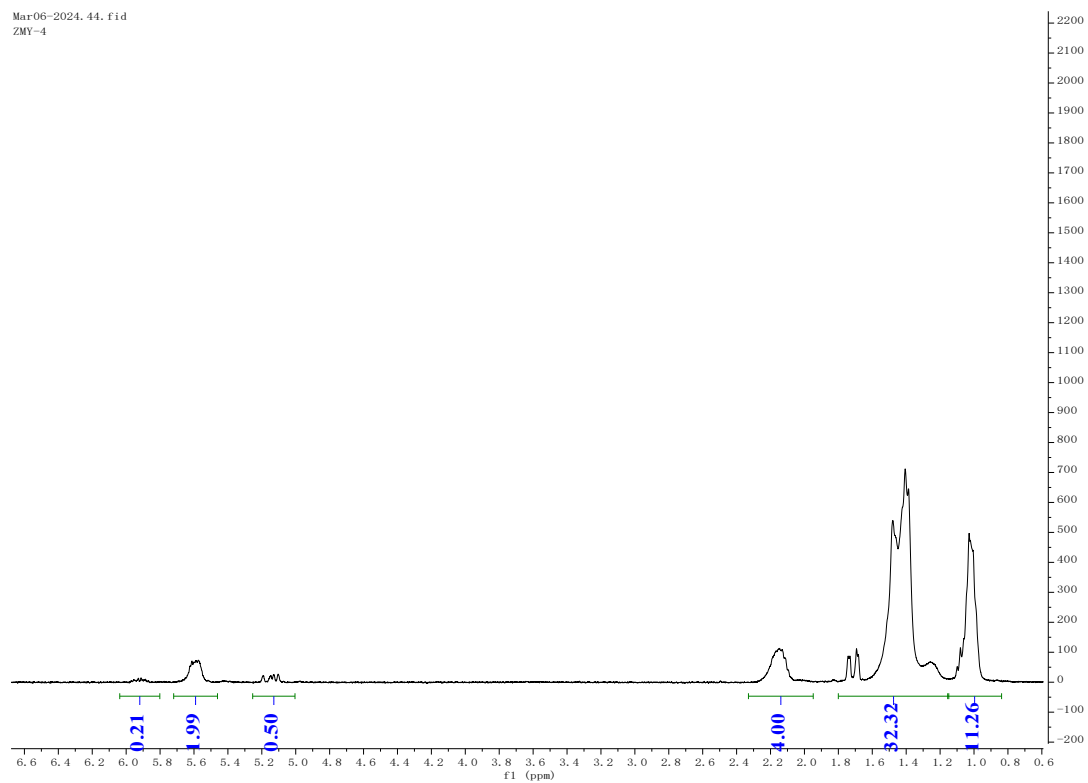

**Figure S20.** <sup>1</sup>H NMR spectrum of the HBOEO from table 1, entry 4 (CDCl<sub>3</sub>, 20 °C).

Mar06-2024.46.fid  
ZMY-6

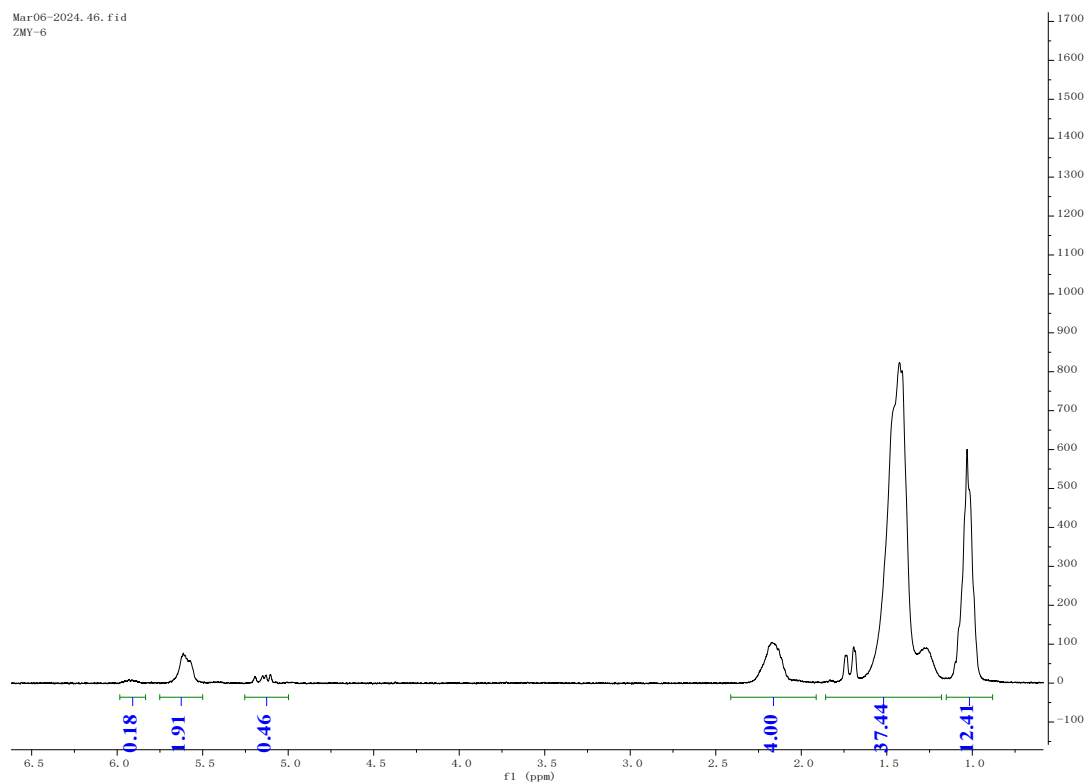

**Figure S21.** <sup>1</sup>H NMR spectrum of the HBOEO from table 1, entry 6 (CDCl<sub>3</sub>, 20 °C).

Mar06-2024.49.fid  
ZMY-9

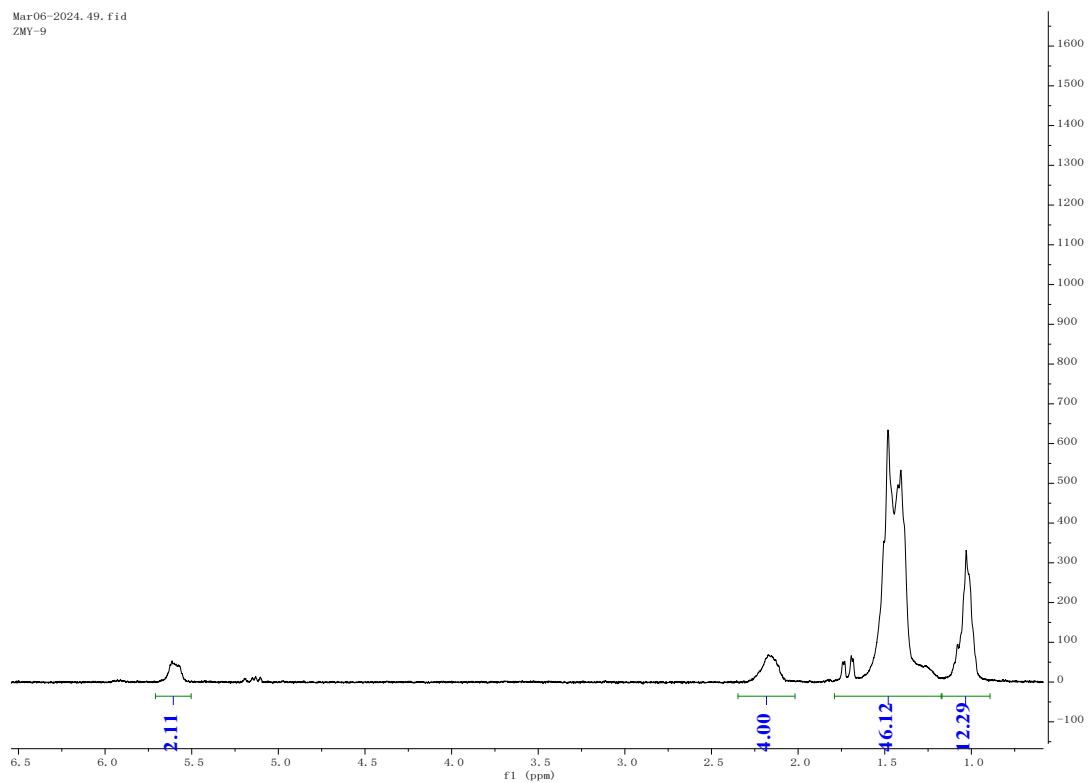

**Figure S22.** <sup>1</sup>H NMR spectrum of the HBOEO from table 1, entry 9 (CDCl<sub>3</sub>, 20 °C).

Mar06-2024.50.fid  
ZMY-10

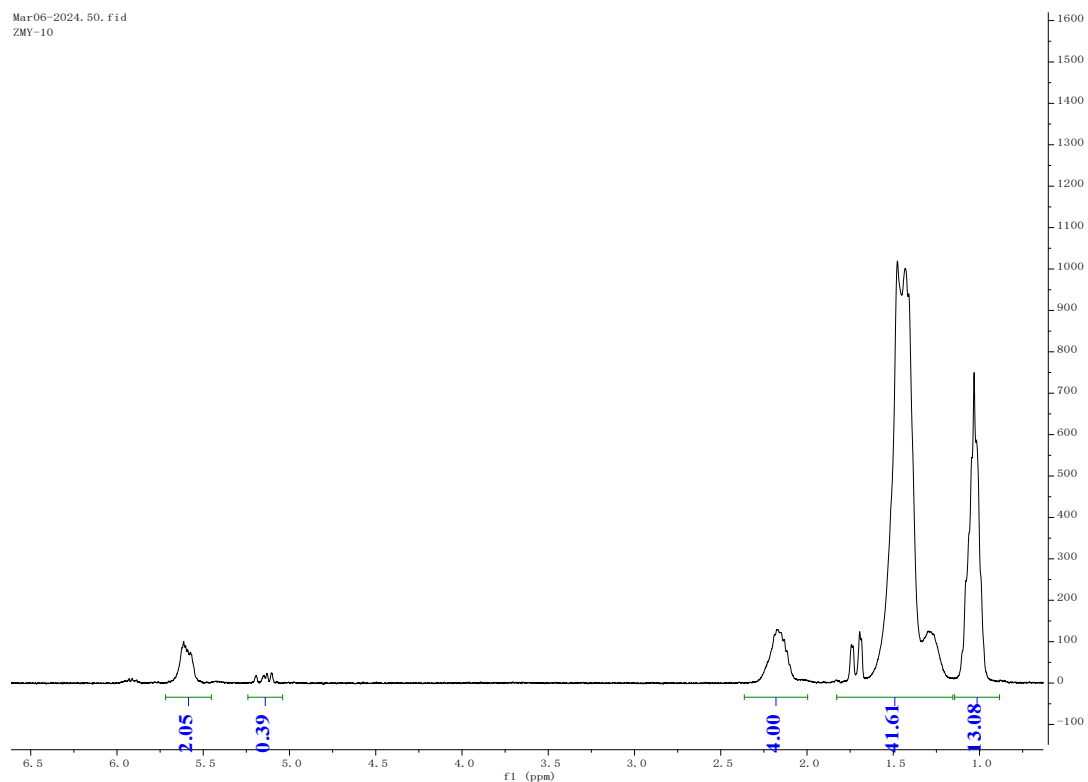

**Figure S23.**  $^1\text{H}$  NMR spectrum of the HBOEO from table 1, entry 10 ( $\text{CDCl}_3$ , 20  $^\circ\text{C}$ ).

Mar06-2024.51.fid  
ZMY-11

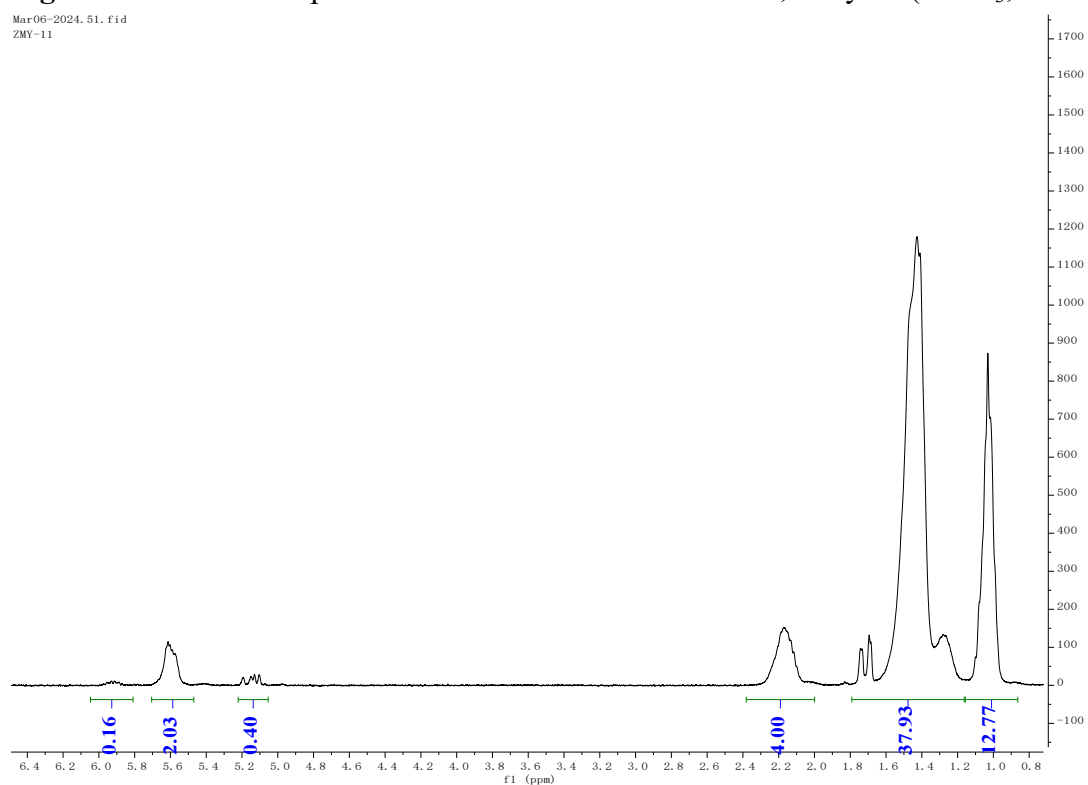

**Figure S24.**  $^1\text{H}$  NMR spectrum of the HBOEO from table 1, entry 11 ( $\text{CDCl}_3$ , 20  $^\circ\text{C}$ ).

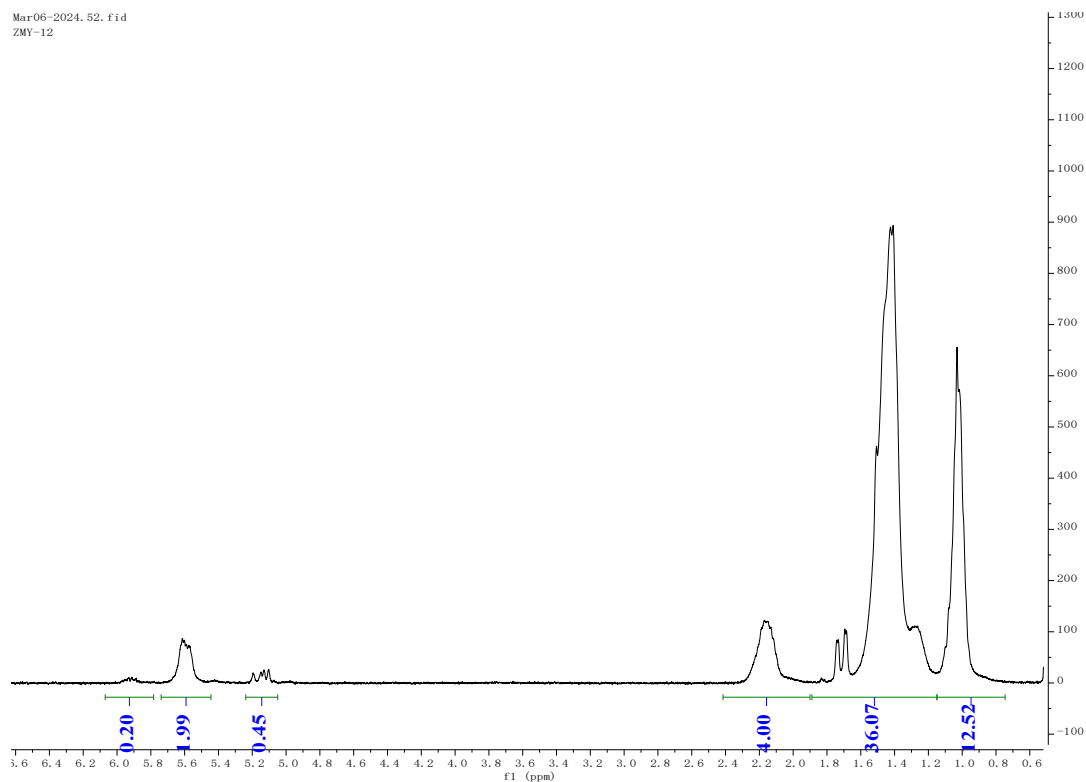

**Figure S25.**  $^1\text{H}$  NMR spectrum of the HBOEO from table 1, entry 12 ( $\text{CDCl}_3$ , 20  $^\circ\text{C}$ ).

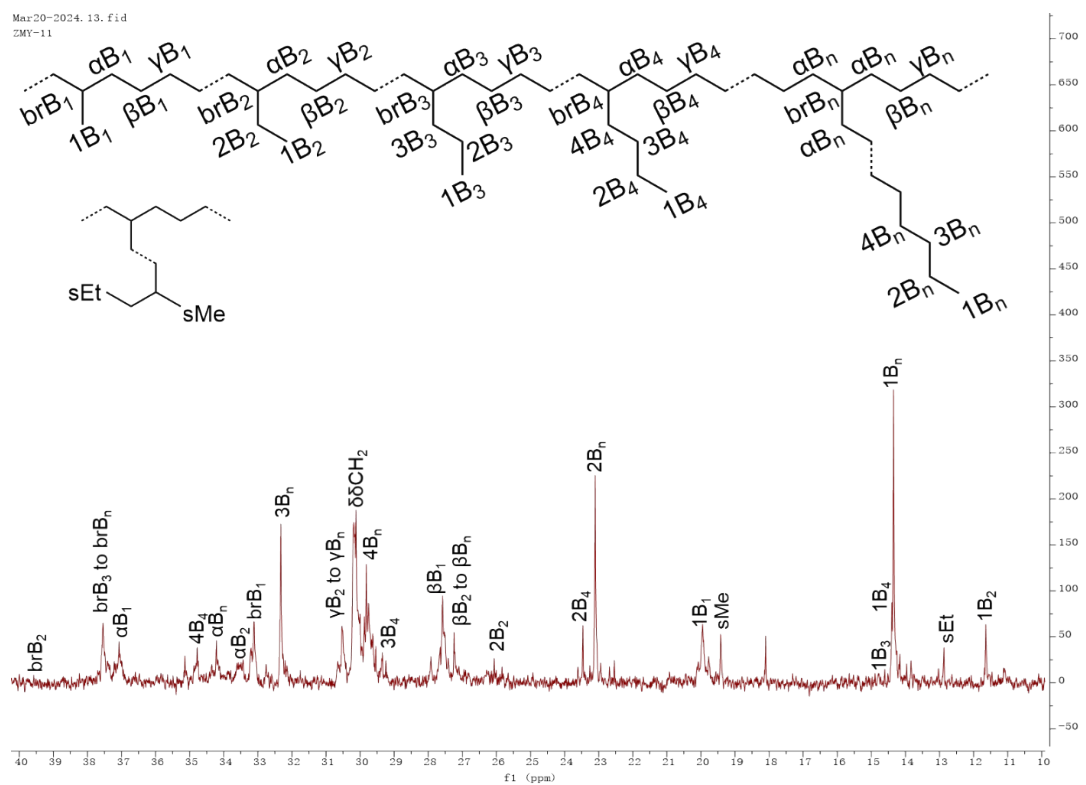

**Figure S26.**  $^{13}\text{C}$  NMR spectrum assignment of HBOEO from table 1, entry 11 ( $\text{CDCl}_3$ , 20  $^\circ\text{C}$ ).

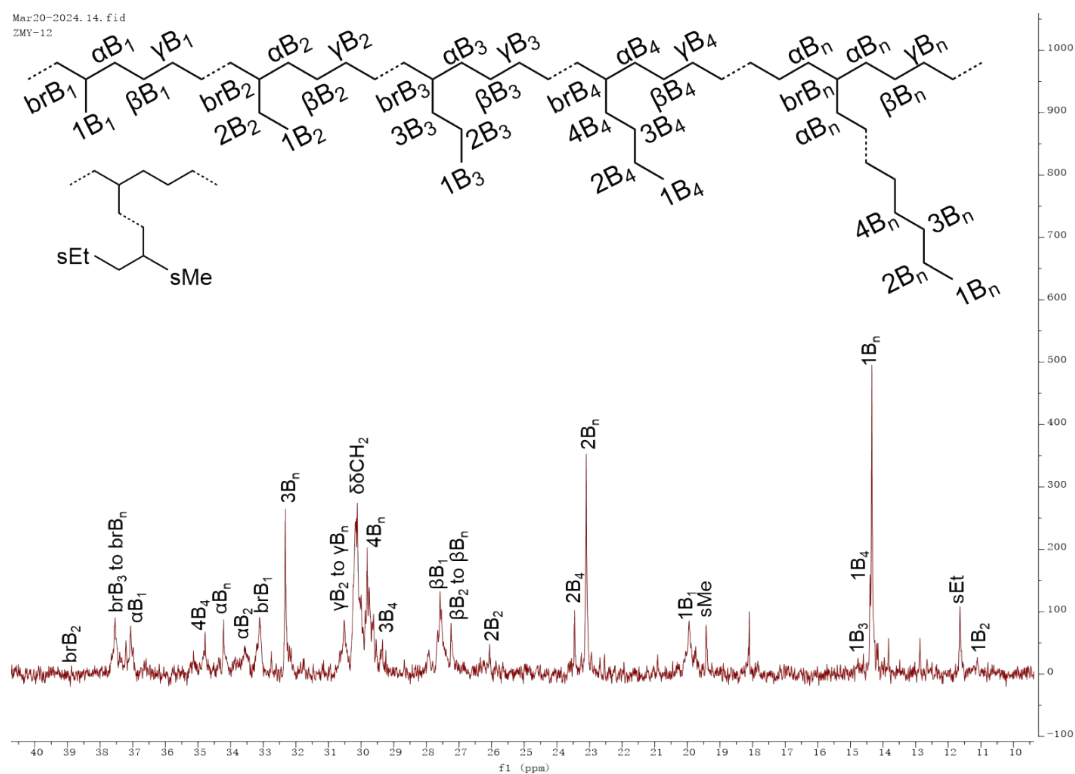

**Figure S27.** <sup>13</sup>C NMR spectrum assignment of HBOEO from table 1, entry 12 (CDCl<sub>3</sub>, 20 °C).

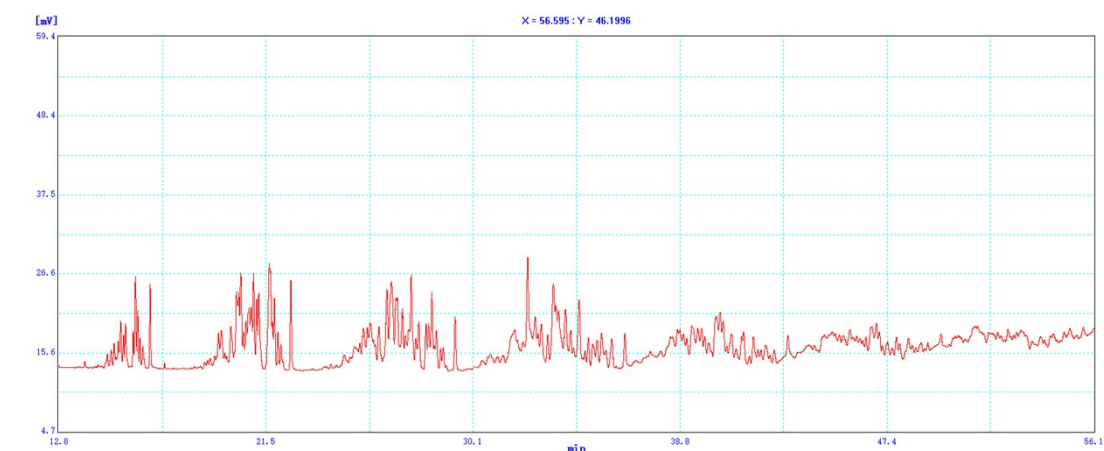

**Figure S28.** GC of the HBOEO from table 1, entry 1.

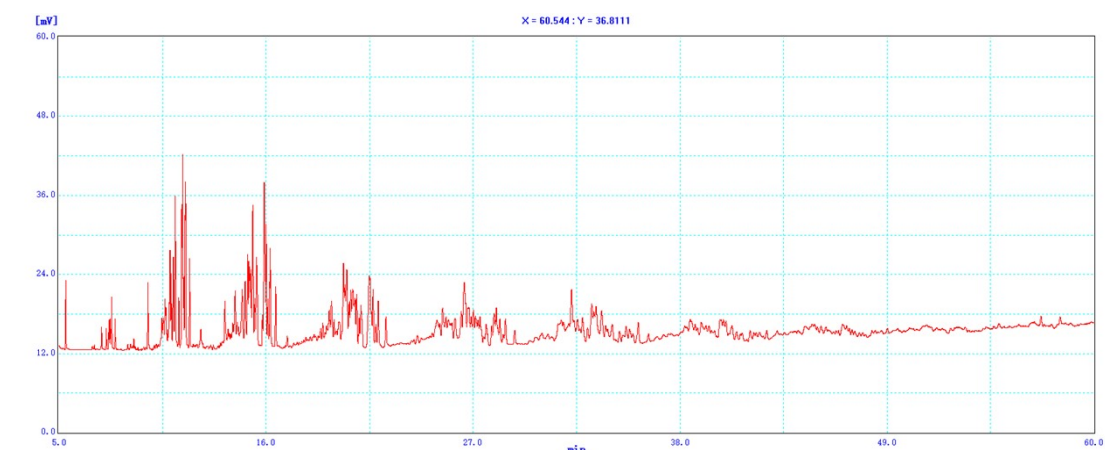

**Figure S29.** GC of the HBOEO from table 1, entry 2.

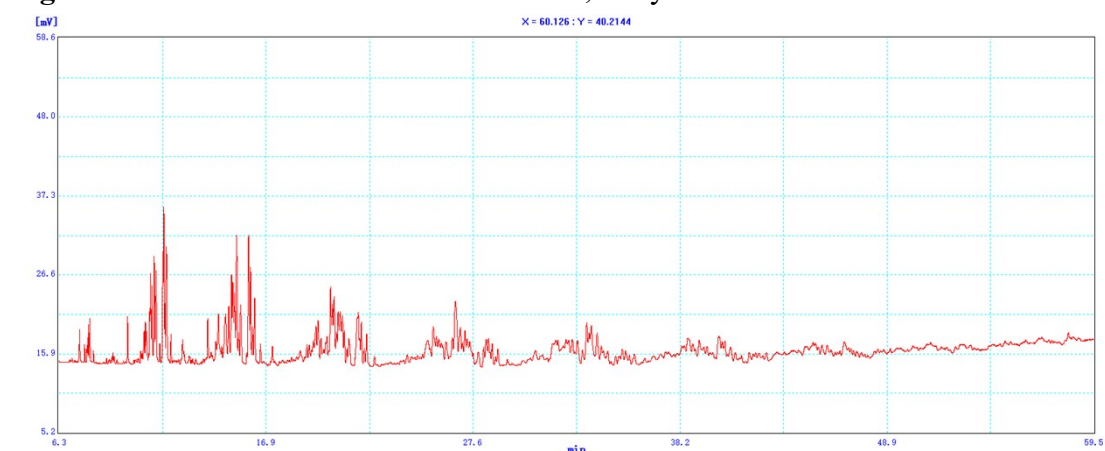

**Figure S30.** GC of the HBOEO from table 1, entry 3.

### 3. X-ray Crystallography

| <b>Table S1 Crystal data and structure refinement for Ni2.</b> |                            |
|----------------------------------------------------------------|----------------------------|
| Identification code                                            | <b>Ni2</b>                 |
| Empirical formula                                              | $C_{31}H_{41}Br_3N_2NiO_2$ |
| Formula weight                                                 | 772.10                     |
| Temperature/K                                                  | 296.93(10)                 |
| Crystal system                                                 | monoclinic                 |
| Space group                                                    | -C 2yc                     |
| a/Å                                                            | 18.9221(2)                 |
| b/Å                                                            | 18.1077(2)                 |
| c/Å                                                            | 21.0075(3)                 |
| $\alpha/^\circ$                                                | 90                         |
| $\beta/^\circ$                                                 | 105.8140(10)               |
| $\gamma/^\circ$                                                | 90                         |
| Volume/Å <sup>3</sup>                                          | 6925.49(15)                |
| Z                                                              | 8                          |



|                                                |                                                              |
|------------------------------------------------|--------------------------------------------------------------|
| $\rho_{\text{calc}}/\text{cm}^3$               | 1.481                                                        |
| $\mu/\text{mm}^{-1}$                           | 5.074                                                        |
| F(000)                                         | 3120                                                         |
| Crystal size/ $\text{mm}^3$                    | $0.12 \times 0.11 \times 0.10$                               |
| Radiation                                      | Cu K $\alpha$ ( $\lambda = 1.54184$ )                        |
| $2\theta$ range for data collection/ $^\circ$  | 10.42 to 156.2                                               |
| Index ranges                                   | $-23 \leq h \leq 18, -22 \leq k \leq 22, -26 \leq l \leq 26$ |
| Reflections collected                          | 27825                                                        |
| Independent reflections                        | 6573 [Rint = 0.0392, Rsigma = 0.0455]                        |
| Data/restraints/parameters                     | 6573/0/353                                                   |
| Goodness-of-fit on $F^2$                       | 1.043                                                        |
| Final R indexes [ $I \geq 2\sigma(I)$ ]        | R1 = 0.0508, wR2 = 0.1505                                    |
| Final R indexes [all data]                     | R1 = 0.0486, wR2 = 0.1530                                    |
| Largest diff. peak/hole / $e \text{ \AA}^{-3}$ | -0.6/1.4                                                     |
